# Supplementary material
Source: publisher site journal article supplement (https://www.dovepress.com/article/508765)
Supplement: Supplementary file 1 [file get_supplementary_file.php]

**Supplementary Material**

TableS1. Category and definition of the variables

| Variables | Variable classification | Original data |
| --- | --- | --- |
| Age | 20-39 | - |
| 40-59 | - |
| 60-79 | - |
| >=80 |  |
| BMI | Normal（18.5-25Kg/m2） |  |
| Underweight(<18.5Kg/m2) |  |
| Obese(>=30Kg/m2) |  |
| Overweight(25-30Kg/m2) |  |
| PIR | 0-1.29 |  |
| 1.30-3.49 |  |
| ≥3.50 |  |
| PA | no PA  (<60, MET-min/week) |  |
| Low intensity PA  (60-2880, MET-min/week) |  |
| High intensity PA  (>2880, MET-min/week) |  |
| Race | Mexican American | Mexican American |
| Non-Hispanic White | Non-Hispanic White |
| Non-Hispanic Black | Non-Hispanic Black |
| Other race | other race - including multi-racial、Other race |
| Education | Less than 9th grade | never attended / kindergarten only 、1st grade、2nd grade、3rd grade、4th grade、5th grade、6th grade:、7th grade 8th grade、less than 9th grade、9th grade、less than 5th grade |
| 9-11th grade | 9-11th grade (includes 12th grade with no diploma)、12th grade, no diploma、10th grade、11th grade |
| High school graduate | more than high school、high school graduate、high school grad/ged or equivalent、ged or equivalent |
| Some college | some college or aa degree |
| College graduate or above | college graduate or above、 |
| Smoke | Current | smoked moth than 100 cigarettes in life and smoke some days or every day |
| Former | smoked more than 100 cigarettes in life and smoke not at all now |
| Never | smoked less than 100 cigarettes in life |
| Alcohol | No | Judgements based on interview data, Had <12 drinks in lifetime |
| Yes | Judgements based on interview data. Had>=12 drinks in lifetime |
| Diabetes | No | If both of the following conditions are satisfied, it is YES, and vice versa:  1.doctor told you have diabetes  2.Use of diabetes medication or insulin, |
| yes |
| Hypertension | No | If one of the following conditions is met, it is YES, and none of them is met, it is NO:  1.doctor told you have diabetes  2. the use of antihypertensive medication  3. systolic blood pressure ≥ 140 mmHg, diastolic  blood pressure ≥ 90 mmHg |
| Yes |
